1 **The genome-wide transcriptional response to varying RpoS levels in *Escherichia***  
2 ***coli* K-12.**

3

4 Garrett T. Wong<sup>1,2</sup>, Richard P. Bonocora<sup>3</sup>, Alicia N. Schep<sup>1,4</sup>, Suzannah M. Beeler<sup>1,5</sup>,  
5 Anna J. Lee Fong<sup>1,6</sup>, Lauren M. Shull<sup>1,7</sup>, Lakshmi E. Batachari<sup>1</sup>, Moira Dillon<sup>1</sup>, Ciaran  
6 Evans<sup>8,9</sup>, Carla J. Becker<sup>1</sup>, Eliot C. Bush<sup>1</sup>, Johanna Hardin<sup>8</sup>, Joseph T. Wade<sup>3,10,#</sup>, and  
7 Daniel M. Stoebel<sup>1,#</sup>

8

9 1 Department of Biology, Harvey Mudd College, Claremont CA

10 2 Current address: Departments of Neuroscience, Genetics and Genome Sciences,  
11 Icahn School of Medicine at Mount Sinai.

12 3 Wadsworth Center, New York State Department of Health, Albany NY

13 4 Current address: Department of Genetics, Stanford University

14 5 Current address: Division of Biology and Biological Engineering, California Institute of  
15 Technology

16 6 Current address: a-tek, Washington DC

17 7 Current address: Sackler School of Graduate Biomedical Sciences, Tufts University

18 8 Department of Mathematics, Pomona College, Claremont CA

19 9 Current address: Department of Statistics, Carnegie Mellon University

20 10 Department of Biomedical Sciences, School of Public Health, University at Albany,  
21 SUNY, Albany NY

22

23 # Address correspondence to Joseph T. Wade, [joseph.wade@health.ny.gov](mailto:joseph.wade@health.ny.gov), or Daniel

24 M. Stoebel, [stoebel@g.hmc.edu](mailto:stoebel@g.hmc.edu)

25

26 Running title: Effect of RpoS concentration on *E. coli* transcriptome

27

## 28 **Abstract**

29 The alternative sigma factor RpoS is a central regulator of a many stress responses in  
30 *Escherichia coli*. The level of functional RpoS differs depending on the stress. The effect  
31 of these differing concentrations of RpoS on global transcriptional responses remains  
32 unclear. We investigated the effect of RpoS concentration on the transcriptome during  
33 stationary phase in rich media. We show that 23% of genes in the *E. coli* genome are  
34 regulated by RpoS level, and we identify many RpoS-transcribed genes and promoters.  
35 We observe three distinct classes of response to RpoS by genes in the regulon: genes  
36 whose expression changes linearly with increasing RpoS level, genes whose  
37 expression changes dramatically with the production of only a little RpoS (“sensitive”  
38 genes), and genes whose expression changes very little with the production of a little  
39 RpoS (“insensitive”). We show that sequences outside the core promoter region  
40 determine whether a RpoS-regulated gene is sensitive or insensitive. Moreover, we  
41 show that sensitive and insensitive genes are enriched for specific functional classes,  
42 and that the sensitivity of a gene to RpoS corresponds to the timing of induction as cells  
43 enter stationary phase. Thus, promoter sensitivity to RpoS is a mechanism to  
44 coordinate specific cellular processes with growth phase, and may also contribute to the  
45 diversity of stress responses directed by RpoS.

46

## 47 **Importance**

48 The sigma factor RpoS is a global regulator that controls the response to many stresses  
49 in *Escherichia coli*. Different stresses result in different levels of RpoS production, but  
50 the consequences of this variation are unknown. We describe how changing the level of

51 RpoS does not influence all RpoS-regulated genes equally. The cause of this variation  
52 is likely the action of transcription factors that bind the promoters of the genes. We show  
53 that the sensitivity of a gene to RpoS levels explains the timing of expression as cells  
54 enter stationary phase, and that genes with different RpoS sensitivities are enriched for  
55 specific functional groups. Thus, promoter sensitivity to RpoS is a mechanism to  
56 coordinate specific cellular processes in response to stresses.

57

## 58 **Introduction**

59

60 Genome-wide measurements of RNA levels have revolutionized our understanding  
61 of how cells organize their patterns of transcription. These studies have given us  
62 snapshots of how patterns of gene expression change in response to changes in the  
63 external environment. They have also allowed us to define the regulons controlled by  
64 specific transcription factors. A major weakness of the vast majority of these studies is  
65 that they explore the function of a regulatory protein only by comparing expression of  
66 target genes in a wild-type strain to a gene knock-out, or to a mutant with a single  
67 diminished or increased level of activity. While some genetic regulatory networks are  
68 certainly switch-like (1, 2) and can be fully characterized by only two levels of activity,  
69 many other regulatory proteins vary continuously in their abundance and/or activity.  
70 How regulons respond to a range of regulator levels is a largely unstudied question (3).  
71 Should we expect all genes in a regulon to increase or decrease expression by the  
72 same relative amount following a change in abundance of a regulatory protein? Or  
73 should we expect genes to respond in different ways? These questions motivate this  
74 study.

75 A paradigmatic example of a bacterial regulatory protein whose abundance and  
76 activity vary continuously in response to different conditions is the alternative sigma  
77 factor RpoS in *Escherichia coli*. Transcription by RNA polymerase containing RpoS is  
78 responsible for the general stress response (4–6). Under conditions of optimal growth in  
79 the laboratory (such as exponential phase growth in rich media at 37°C), RpoS levels  
80 are nearly undetectable in the model *E. coli* strain K-12. As conditions become poorer  
81 for growth, either because cells begin to starve for various nutrients, or because they  
82 face physical challenges such as low temperature or elevated osmolarity, RpoS levels  
83 rise (4–6). RpoS coordinates the transcription of genes that are critical for the response  
84 to these stresses.

85 RpoS expression is not an all-or-none phenomenon. For example, RpoS levels rise  
86 continuously as cells transition from exponential growth to stationary phase (7).  
87 Moreover, starvation for different nutrients upregulates RpoS to differing levels (8, 9).  
88 This level of control over RpoS levels is accomplished by regulating transcription,  
89 translation, and protein degradation (4, 7, 10), allowing for careful control over protein  
90 levels. In addition to regulation of protein abundance, RpoS activity can also be directly  
91 modulated by a number of factors, such as Crl (11).

92 Not only do RpoS levels vary across conditions for a single strain, but different  
93 strains of *E. coli* also differ in their patterns of expression of RpoS. For example,  
94 naturally occurring strains can differ in the amount of RpoS they produce during  
95 exponential phase (12) or stationary phase (13). All studies that have measured RpoS  
96 levels in naturally occurring strains of *E. coli* have detected variation (13–17), though

97 the extent and cause of this variation in RpoS between strains is still a matter of some  
98 controversy (16, 17).

99 Microarray studies (18–20) have shown that RpoS controls the expression of at least  
100 500 genes (over 10% of the genome) either directly or indirectly, but the set of RpoS-  
101 regulated genes differs across environmental conditions. For most RpoS-controlled  
102 genes, it is not known whether the gene is directly transcribed by RpoS or regulated  
103 indirectly, as a consequence of RpoS transcribing other genes. Previous studies have  
104 not investigated the impact of changes in RpoS levels on the RpoS regulon, or whether  
105 quantitative differences in RpoS levels between environmental conditions influence the  
106 observed differences in what genes are RpoS-regulated. It is clear that *E. coli* has a  
107 complicated regulatory network to fine-tune RpoS levels to different conditions, but we  
108 do not yet know the consequences of this regulation.

109 In this study, we tested the hypothesis that members of the RpoS regulon vary in  
110 their response to RpoS levels. Using a combination of ChIP-seq and RNA-seq, we  
111 identified RpoS-regulated genes, and we showed that genes vary in their sensitivity to  
112 RpoS levels in a manner dependent on sequences outside of the core promoter region.  
113 Sensitivity of genes to RpoS levels corresponds to the order in which genes are induced  
114 during the transition into stationary phase, and genes with different levels of sensitivity  
115 are enriched for specific functional groups. Thus, the level of sensitivity of genes to  
116 RpoS controls the physiological response to different stress conditions.

117

## 118 **Materials and Methods**

119

120 *Culture conditions*

121 Cells were grown in 5mL of LB broth (1% tryptone, 0.5% yeast extract, 1% NaCl) in  
122 150 x 18 mm tubes, positioned vertically and shaking at 225 rpm at 37°C in a water bath,  
123 unless otherwise specified in the text. When required, antibiotics were used at the  
124 following final concentrations: ampicillin at 100 µg/ml (for plasmids) or 25 µg/ml (for  
125 chromosomal integration); chloramphenicol at 20 µg/ml; kanamycin at 50 µg/ml.

126

127 *Strains and genetic manipulations*

128 Strains and plasmids used in this study are listed in Table S1. The wild-type genetic  
129 background for this all experiments except for ChIP-seq is BW27786, a strain designed  
130 to give a graded transcriptional response to increasing arabinose concentration (21). To  
131 create a strain of this background lacking *rpoS*, the  $\Delta rpoS746::kan$  allele of JW5437  
132 (22) was moved by P1 transduction into BW27786, creating strain DMS2545.

133 The arabinose-inducible RpoS strain was created by PCR amplifying the *kan* gene  
134 and the  $P_{araB}$  promoter of plasmid pAH150 (23) using primers ParaBRpoSRecomb-F  
135 and ParaBRpoSRecomb-R (Table S2). This PCR product was then integrated into the  
136 *nlpD* gene (i.e. 5' of *rpoS*) in a MG1655 background using plasmid pKD46 (24), and P1  
137 transduced into BW27786, creating strain DMS2564. This strain thus lacks both the  
138 native transcriptional and translational control of RpoS.

139 For flow cytometry experiments, plasmid pDMS123 (25), which contains a *otsB-gfp*  
140 transcriptional fusion, was transformed into DMS2564 by the method of Groth et al. (26).

141 ChIP-seq experiments used strain RPB104, an unmarked derivative of MG1655 that  
142 expresses a C-terminally SPA-tagged derivative of RpoS from its native locus. This

143 strain was constructed by P1 transduction of kan<sup>R</sup>-linked *rpoS*-SPA from a previously  
144 described strain (27). The kan<sup>R</sup> cassette was removed using the pCP20 plasmid that  
145 encodes Flp recombinase (24).

146

#### 147 *Construction and chromosomal integration of lacZ fusions*

148 The *gadB* and *astC* plasmids were built by standard cloning methods. The *gadC*  
149 and *astA* promoter regions with transcription factor binding sites were PCR-amplified  
150 with primers *gadC*promoter +/- and *astA*promoter +/- (Table S2), which included *KpnI*  
151 and *EcoRI* restriction sites for cloning. Cloning of core promoter regions was performed  
152 by annealing oligonucleotides designed to contain the whole RpoS binding region, as  
153 predicted by Fraley *et al.* (28) and Castanie-Cornet and Foster (29). Oligonucleotides  
154 were annealed by heating 1 μM of forward and reverse primer for one minute at 100°C  
155 with 5 mM MgCl<sub>2</sub> and 7 mM Tris-HCl and then cooling slowly to room temperature.  
156 Inserts and plasmid (pLFX) were digested with *EcoRI*-HF and *KpnI*-HF (NEB), ligated  
157 with T7 ligase (NEB) and cloned into strain BW23473. Transformants were minipreped  
158 and inserts were verified by Sanger sequencing.

159 The *gadA* and *hdeA* plasmids were built using Gibson assembly (30) with the  
160 NEBuilder HiFi Assembly kit (New England Biolabs). The *gadA* and *hdeA* promoter  
161 regions were PCR amplified with primers *hdeA*HiFi+/- and *gadA*HiFi+/- . The core  
162 promoter was cloned with the single long oligo *hdeA*coreHiFi or *gadA*coreHiFi, as  
163 predicted by Arnqvist *et al* (31) and De Biase *et al* (32). PCR products or  
164 oligonucleotides were mixed with pLFX digested with *KpnI*-HF and *EcoRI*-HF, and  
165 assembled according to the manufacturers' instructions. Mixtures were cloned into



166 strain BW23473, transformants were miniprepmed, and inserts were verified by Sanger  
167 sequencing.

168 *lacZ* fusion plasmids were integrated into strain DMS2564 with helper plasmid  
169 pPFINT (33). Single-copy integrants were confirmed using the PCR assay of Haldimann  
170 and Wanner (23).

171

### 172 *Quantitative Western Blotting*

173 Quantitative western blotting was used to measure RpoS levels. Cells were  
174 inoculated from frozen cultures into 5 mL of LB, and grown overnight at 37 °C, shaken  
175 at 225 rpm. 5 µL of this overnight culture was diluted into 5 mL of LB with the  
176 appropriate concentration of arabinose, and grown for 20 h. 100 µL of overnight culture  
177 to be assayed was centrifuged and resuspended in 1X Laemmli sample buffer (Sigma-  
178 Aldrich) and boiled for 5 minutes. Samples were diluted 1:10 in 1X Laemmli, and 10 µL  
179 was electrophoresed on a 10% polyacrylamide gel (Bio-Rad) in tris-glycine running  
180 buffer (25 mM Tris base, 250 mM glycine, 0.5% SDS) at 100 V for 90 min at room  
181 temperature. Proteins were transferred to an Immobilon-FL PVDF membrane by  
182 electrophoresis at 100 V for 45 min at 4 °C in transfer buffer (48 mM Tris base, 39 mM  
183 glycine, 20% methanol, and 0.0375% SDS). Membranes were blocked by overnight  
184 incubation in Odyssey blocking buffer (Li-Cor) at 4 °C.

185 The blocked membrane was probed with affinity-purified monoclonal antibodies  
186 to RpoS (clone 1RS1) and RpoD (clone 2G10) (NeoClone) at a final concentration of  
187 0.4 µg / mL in Odyssey blocking buffer plus 0.2% Tween 20 for 1 hour at room  
188 temperature. The membrane was washed four times for five minutes each with 15 mL of

189 1X TBST. A fluorescent secondary antibody (IRDye 800CW goat anti-mouse, Li-Cor)  
190 was diluted 1:10,000 in a solution of Odyssey Blocking Buffer plus 0.2% Tween 20 and  
191 0.01% SDS and incubated in the dark for 1 hour at room temperature. The membrane  
192 was washed as before, dried for 2 hours between sheets of Whatmann 3MM blotting  
193 paper, and imaged on a LiCor Clx fluorescent imager.

194 Band intensity was estimated using Image Studio 2.1 (LiCor). RpoS levels were  
195 divided by RpoD levels to normalize for differences in total protein levels. The ratio of  
196 RpoS to RpoD is biologically meaningful because this ratio, rather than RpoS level  
197 alone, dictates levels of transcription from RpoS-dependent promoters due to sigma  
198 factor competition (34).

199

#### 200 *RNA-seq experiments and analysis*

201 Cells were inoculated from frozen cultures into 5 mL of LB, and grown overnight. 5  
202  $\mu$ L of this overnight culture was diluted into 5 mL of LB and grown for 20 hours. (For the  
203 intermediate 26% RpoS condition, a final concentration of  $10^{-4}$ % arabinose was also  
204 added.) RNA was purified from 200  $\mu$ L of overnight culture by pelleting and  
205 resuspending in 500  $\mu$ L of Trizol at 65 °C, followed by purification on a column (Direct-  
206 Zol, Zymo Research). Samples received two 30-minute DNase treatments using  
207 TURBO DNA-free (Ambion) following the manufacturer's instructions. RNA samples  
208 were then purified on a column (RNA Clean & Concentrator, Zymo Research). Samples  
209 were stored at -80 °C until used. Three samples were prepped from each culture and  
210 pooled to generate sufficient RNA. Two biological replicates were prepared for each  
211 strain or condition of interest. rRNA depletion, cDNA synthesis, library preparation, and

212 sequencing were performed by a commercial provider (OtoGenetics, Norcross, GA).

213 Paired-end, 100 bp sequences were generated for 7-15 million reads per sample.

214 Before reads were mapped, the first ten base pairs of each read were trimmed using

215 FASTX-Toolkit 0.0.13. Reads were mapped to the NCBI K12 reference genome

216 (NC\_000913.2 Escherichia coli str. K-12 substr. MG1655) using BWA v0.7.5a (35). The

217 number of read pairs mapped to each gene was counted with HTSeq 0.6.1 (36).

218 Differential expression analysis was performed with DESeq v2.13 (37). All p-values

219 were first FDR adjusted using the procedure of Benjamini and Hochberg (38). p-values

220 were then further Bonferroni-adjusted for the three comparisons between pairs of RpoS

221 levels. All differential expression p-values reported in this paper reflect both the FDR

222 and Bonferroni-adjustments.

223 To determine if a gene differed significantly from the null expectation of linearity, we

224 calculated the probability of the observed read count value at 26% RpoS if the true

225 expression level was given by the linear prediction between the endpoints. Note that to

226 calculate both the expected read count and the probability of the observed value under

227 the null (i.e. the p-value) our model required estimating both the DESeq size factor (for

228 scaling) and the dispersion (a variance factor) for each of the samples. The negative

229 binomial probability model (routinely used to measure count data, (e.g. (37))) was used,

230 with the size factors and dispersion estimated from DESeq (37) to calculate the

231 probability of the observed read count at 26% RpoS.

232 GO term analysis was performed using the topGO package (39) together with the

233 org.EcK12.eg.db annotation package (40) in R 3.1.0. Enrichment was assessed using

234 the weight01 algorithm (39) together with the Fisher's-exact test. The GO hierarchy

235 was pruned to include only nodes with at least five associated genes, as significance  
236 tests can be unstable for GO terms with fewer genes (39).

237 A Venn diagram of the number of significant genes in each condition was prepared  
238 with EulerAPE 3.0.0 (41).

239 Analysis of transcription factor binding site enrichment used data from RegulonDB  
240 (42). We divided RpoS regulated transcriptional units in RegulonDB into sets: sensitive,  
241 insensitive and linear. Then, for each transcription factor in the database we determined  
242 how many of the transcription units it regulates fall into each set. We compared this with  
243 the number of regulated transcription units within the whole RpoS regulon. A case of  
244 enrichment is where a transcription factor regulates a disproportionately large number of  
245 units in a particular set (e.g. the sensitive set) compared with what we would expect  
246 based on the RpoS regulon as a whole. We identified such cases using a one-tailed  
247 hypergeometric test. All p-values were then FDR adjusted using the procedure of  
248 Benjamini and Hochberg (38). Transcription factors that with an FDR-adjusted p-value <  
249 0.05 that regulated at least two transcription units in the gene set were considered  
250 enriched.

251

### 252 *ChIP-seq analysis*

253 *E. coli* strain RPB104 (MG1655 with C-terminally SPA-tagged *rpoS*) was grown  
254 overnight in M9 minimal medium with 0.4% glycerol at 30 °C and then subcultured  
255 1:100 in the same medium, and grown for 60 hours to saturation (OD<sub>600</sub> of ~3). ChIP-  
256 seq using the M2 monoclonal anti-FLAG antibody was performed as described

257 previously (43). Regions of enrichment (“peaks”) were identified as described previously  
258 (44). Relative enrichment was reported as a “Fold Above Threshold” (FAT) score.

259 We used MEME-ChIP (Version 4.11.2; default parameters) to analyze enriched  
260 regions identified by ChIP-seq (45) Regions within 100 bp were merged. The reported  
261 sequence motif was identified by MEME (Version 4.11.2) (46), run within the MEME-  
262 ChIP environment.

263 We used MEME (46) within the MEME-ChIP environment (Version 4.11.2; default  
264 parameters except that only the given strand was analyzed) to identify enriched  
265 sequence motifs in regions surrounding TSSs associated with RpoS ChIP-seq peaks.  
266 We analyzed sequences from -45 to +5 relative to each TSS.

267 We identified directly RpoS-transcribed genes by requiring that (i) the gene start is  
268 within 300 bp of a ChIP-seq peak, (ii) the gene is positively regulated by RpoS, as  
269 determined by RNA-seq, (iii) no other positively regulated gene starts within 300 bp of  
270 the ChIP-seq peak, (iv) there is no associated sequence motif or TSS (identified in (47))  
271 that would be consistent with transcription in the opposite orientation. For regulated  
272 genes, we determined whether other genes in the same operon were also regulated,  
273 using a published operon list (48) for *E. coli*. Peaks were associated with transcription  
274 start sites from a previous study (47) by identifying transcription start sites within 20 bp  
275 of a peak.

276

277 *QPCR*

278 RNA was isolated as for RNA-seq, except that samples underwent three 30-minute  
279 DNase treatments using TURBO DNA-free (Ambion). cDNA was made from the RNA

280 samples using SuperScript VILO master mix (Invitrogen) and stored at -20 °C for use in  
281 quantitative real-time PCR (qPCR) reactions.

282 qPCR was performed using Power SYBR Green master mix (Invitrogen), 2 µL of  
283 cDNA, and primers at 300 nM. Cycling was performed at 95 °C for 10 min; and 40  
284 cycles of 95 °C for 15 sec, 58 °C for 15 sec, and 68 °C for 30 sec. Three control genes  
285 (*ftsZ*, *pgm*, and *hemL*) were used in addition genes of interest. These genes were  
286 selected using the approach of Vandesompele et al. (49). Details of this selection  
287 process, including the other seven genes tested, are available in Supplementary Text 1,  
288 Table S3, and Figure S1.

289 For each gene, a standard curve was made using the following amounts of genomic  
290 DNA: 200 ng, 20 ng, 2 ng, 200 pg, 20 pg, and 2 pg. Genomic DNA was extracted from  
291 overnight cultures using a Puregene Kit (Qiagen), following the manufacturer's  
292 instructions. Expression levels for each gene were interpolated from the standard curve.  
293 Expression levels of experimental genes were divided by the geometric mean of the  
294 three control genes.

295 Statistical assessment of sensitivity was performed by a bootstrapping approach.  
296 Bootstrapping, rather than a parametric approach, was appropriate because the data  
297 did not conform to parametric assumptions. In this approach, the unit of resampling was  
298 the RNA isolated from the 0%, 26% and 100% RpoS conditions on an individual day.  
299 For each resampled data set, the median expression at 0% and 100% RpoS was  
300 calculated. The linear fit from the 0% RpoS median and the 100% RpoS median was  
301 then used to predict the level of expression at the intermediate level of RpoS. Repeating  
302 this re-sampling of the data 10,000 times yielded a 95% confidence interval for 26%

303 RpoS. The observed median for 26% was then compared to the confidence interval to  
304 test for significance.

305

### 306 *Beta-galactosidase activity*

307 Beta-galactosidase activity was measured using the method of Miller (50). With  
308 lacZ fusion strains, the level of sensitivity was quantified, rather than only categorized  
309 as sensitive, linear, or insensitive. To quantify the level of sensitivity, for each replicate  
310 we calculated the distance between the observed expression at the intermediate RpoS  
311 concentration and the expected level based on a linear pattern, standardized by the  
312 difference in expression between high and low RpoS conditions. Testing if sensitivities  
313 were different from zero used a one-sample t-test, with p-values adjusted for multiple  
314 comparisons using Holm's sequential adjustment method (51). Testing if two  
315 sensitivities were different used a two-sample t-test with the same method of adjustment  
316 for multiple comparisons.

317

### 318 *Analysis of published RNA-seq data*

319 We analyzed published RNA-seq data for wild-type and  $\Delta rpoS$  *E. coli* over a  
320 time-course of growth into stationary phase (48). Using normalized genome coverage  
321 information extracted from wiggle files, we calculated relative abundance for all genes at  
322 each of the four stationary phase time-points in the growth curves (the last four time-  
323 points for each strain). We arbitrarily selected a threshold coverage value of 500 and  
324 excluded any genes scoring below this threshold at all four time-points in wild-type cells.  
325 This reduced variability associated with low expression levels. We excluded any genes

326 for which coverage at the final time-point was 0 since this would have prevented  
327 normalization. We also excluded any gene for which the first stationary phase time-point  
328 had the highest expression value of the four time-points for wild-type cells, since RpoS-  
329 dependent expression of these genes is likely to be masked by other factors. We then  
330 selected genes whose expression we had found to be induced by RpoS, and separated  
331 these genes into insensitive, linear, and sensitive classes. We calculated expression  
332 levels for each of these genes relative to expression at the final time-point.

333

334 *Accession numbers*

335 RNA-seq data were deposited in GEO with accession number GSE87856. ChIP-seq  
336 data were deposited in ArrayExpress with accession number E-MTAB-5339.

337

## 338 **Results**

339

340 *The RpoS regulon in late stationary phase.*

341 To understand the role of the RpoS protein in late stationary phase, we used RNA-  
342 seq to compare the transcriptome of wild-type and  $\Delta rpoS$  cells. We observed differential  
343 expression of 1044 genes (23% of genes) between these two conditions ( $p < 0.05$ ). Of  
344 the 1044 genes whose expression is influenced by RpoS, 605 are upregulated, and 439  
345 are downregulated (Table S4).

346 Influencing transcription of 23% of the genome could have many potential  
347 phenotypic effects. To better understand the function of these genes, we examined  
348 which kinds of gene functions, as described by the gene ontology (GO), are more



349 abundant in the regulon than expected by chance. GO enrichment analysis indicates  
350 that the RpoS regulon includes many genes involved in metabolic processes (Table 1);  
351 17 of 18 significantly enriched GO terms are metabolic terms. This metabolic  
352 reorganization includes the upregulation of genes encoding glycolytic enzymes and  
353 pathways for metabolism of L-arginine to glutamine, or from L-arginine to putrescine  
354 and then into succinate. RpoS also drives the downregulation of genes involved in the  
355 TCA cycle. These patterns of metabolic regulation are very similar to those identified in  
356 late stationary phase in *Salmonella enterica* (52). The only significant GO term not  
357 explicitly linked to metabolism (GO:0006970, “response to osmotic stress”) also  
358 includes metabolic genes, such as *otsA* and *otsB*, that are involved in trehalose  
359 biosynthesis.

360 Central metabolism is not the only phenotype similarly regulated by RpoS in both *S.*  
361 *enterica* and *E. coli*. Other similarities include transcription of genes involved in  
362 antioxidant activities, iron regulation, and Fe-S cluster assembly, the upregulation of  
363 proteases, and down regulation of porins. As in *S. enterica*, RpoS in *E. coli* influences  
364 the expression of many genes encoding other regulatory proteins, including *csrA*, *arcA*,  
365 *cra*, *fur*, *ihfA*, *hupA* and *hupB*. These proteins regulate phenotypes including carbon  
366 storage (CsrA), central carbon metabolism (ArcA and Cra), iron homeostasis (FUR),  
367 and also play a central role in structuring the nucleoid (IHF, HU). Not all of the  
368 regulation is identical between *E. coli* and *S. enterica*, however. For example, Lévi-  
369 Meyrueis *et al.* (52) noted that RpoS appears to direct switching between many pairs of  
370 isozymes, where one isozyme is expressed under conditions when RpoS is abundant,  
371 and its partner isozyme is expressed when RpoS levels are low. While some pairs show

372 a similar pattern in *E. coli* (such as *tktA/B* and *acnA/B*), others (such as *fumA/fumC*) do  
373 not show this pattern. The reason why these enzymes involved in central carbon  
374 metabolism might show this pattern is not clear.

375

### 376 *Genome-wide binding profile of RpoS*

377 While RNA-seq identifies which genes are regulated by RpoS, it cannot distinguish  
378 between direct and indirect effects. To determine sites where RpoS binds (and hence  
379 likely plays a direct role in transcription), we used ChIP-seq to map the association of  
380 RpoS across the *E. coli* chromosome during stationary phase growth in minimal  
381 medium. To facilitate ChIP, RpoS was C-terminally SPA-tagged at its native locus. We  
382 reasoned that RpoS would only be identified with promoter regions since it is likely  
383 released from elongating RNAP complexes. We identified 284 peaks of RpoS ChIP-seq  
384 signal covering 260 genomic regions (peaks within 100 bp of each other were merged).  
385 217 of the RpoS-bound regions are intergenic, and 67 are located within genes. We  
386 reasoned that annotated genes that are transcribed by RpoS would be positioned close  
387 to an RpoS-bound region. Consistent with this, 213 RpoS-bound regions are  $\leq 300$  bp  
388 upstream of an annotated gene start. These 213 regions include 27 that are intragenic.  
389 In 79 cases, we observed an RpoS-bound region  $\leq 300$  bp from the starts of two  
390 divergently transcribed genes.

391 We used MEME to search for enriched sequence motifs within the RpoS-bound  
392 regions. We detected a highly enriched motif in 107 regions (Figure 1A); this motif  
393 closely resembles the known -10 hexamer recognized by RpoS (CTAYACT, where the  
394 central YA are not as conserved as the other positions (53)). Moreover, occurrences of

395 the motif are positionally enriched with respect to the ChIP-seq peak center (Figure 1B),  
396 indicating that the data have high spatial resolution. Note that the motifs tend to be  
397 located just upstream of the peak centers (Figure 1B), as we have observed previously  
398 for the *E. coli* flagellar Sigma factor, FliA (44). This presumably reflects the fact that the  
399 footprint of initiating RNA polymerase associated with RpoS is not centered on the -10  
400 hexamer.

401 The identification of RpoS binding sites allowed us to better understand the role of  
402 RpoS in both positive and negative regulation. While similar proportions of the RpoS  
403 regulon are positively and negatively regulated by RpoS, it is not clear if this is true at  
404 the level of direct regulation. Only 19 genes within 300 bp of a binding site are  
405 negatively regulated by RpoS. 19 of the 286 such genes is *fewer* than we would expect  
406 by chance if binding sites were randomly distributed around the genome, given that 439  
407 of 4513 genes in the genome are negatively regulated. On the other hand, 111 of 286  
408 genes within 300 bp are positively regulated, a highly significant effect (Fisher's exact  
409 test,  $p < 10^{-16}$ ). Thus, the binding profile of RpoS is consistent with direct positive  
410 regulation of many genes, but provides no evidence of direct negative regulation.

411

#### 412 *Identification of RpoS-transcribed genes and promoters*

413 We combined the ChIP-seq and RNA-seq data to identify genes that are directly  
414 transcribed by RNA polymerase containing RpoS. Thus, we identified 123 RpoS-  
415 transcribed genes in 99 transcripts (Table S5), and compared them to other published  
416 analyses (18–20, 42, 47, 54–56). In some cases, we identified RpoS-bound regions  
417 upstream of genes that were not detected as being RpoS-regulated by RNA-seq. These

418 genes may have promoters that bind transcriptionally inactive RNA polymerase (57, 58).  
419 (Inactive polymerase could be bound but physically blocked from transcription  
420 elongation by the presence of a bound repressor (59), or could be poised, waiting for a  
421 signal to transition to transcription elongation (60, 61).) Alternatively, the disparity  
422 between RpoS binding and regulation could be explained by differences in growth  
423 conditions between the ChIP-seq and RNA-seq experiments, or by the possibility that  
424 the C-terminal SPA tag affects the function of the C-terminus of the protein in the  
425 response to transcription activators (57, 61).

426         The high spatial resolution of sigma factor ChIP-seq can facilitate the  
427 identification of specific promoters (44, 62) when combined with nucleotide resolution  
428 transcription start site (TSS) maps. Using published TSS data from *E. coli* under  
429 stationary phase conditions similar to those used for the ChIP-seq experiment (47), we  
430 determined all pairwise distances between RpoS ChIP-seq peaks and stationary phase  
431 TSSs. We observed a strong enrichment for peak-TSS distances  $\leq 20$  bp (Figure S2).  
432 We infer that these 112 TSSs are RpoS-transcribed. Consistent with this, the putative  
433 RpoS-transcribed TSSs are associated with -10 hexamers that have features expected  
434 of RpoS promoters (Figure 1C). In some cases, RpoS promoters were identified  $\leq 300$   
435 bp upstream of genes that were not RpoS-regulated in the RNA-seq data set. We  
436 presume that these are RpoS-transcribed genes that otherwise escaped detection  
437 because of differences in the growth conditions used for ChIP-seq and RNA-seq.

438

439         *The transcriptome at three different RpoS levels*

440 This first view of the RpoS regulon considers RpoS as either present or absent.  
441 RpoS levels vary continuously across environmental stresses (7), so we sought to  
442 better understand how the level of RpoS in the cell influences transcription of target  
443 genes. To do this, we placed the *rpoS* gene under the control of the arabinose-inducible  
444 promoter  $P_{araB}$ . This promoter was integrated just upstream of the native *rpoS* gene,  
445 placing transcription under the control of arabinose concentration and removing the 5'  
446 region that regulates translation of the native mRNA (4).

447 To measure the resulting arabinose-induced expression of RpoS, we employed  
448 quantitative western blotting. RpoS levels increased with increasing arabinose  
449 concentration, from undetectable RpoS levels, to levels similar to those in wild-type cells  
450 (Fig 2a). To confirm that expression was graded and not all-or-none in this system (21),  
451 we used flow cytometry to measure expression in individual cells. We transformed the  
452 arabinose-inducible RpoS strain with the plasmid pDMS123 (25), which contains the  
453 RpoS-dependent *otsBA* promoter fused to *gfp*. As expected, *gfp* expression increased  
454 with increasing arabinose concentrations, and at each expression level the population  
455 was unimodal (Fig 2b).

456 We measured the transcriptome in cells with 26% of wild-type levels of RpoS,  
457 achieved with the addition of  $10^{-4}$  % arabinose to cells with our arabinose-inducible *rpoS*  
458 strain. Of the genes that are differentially expressed between 26% RpoS and either 0%  
459 ( $\Delta rpoS$ ) or 100% (wild-type), 95% are also differentially expressed between 0% and  
460 100% (Fig 3) ( $p < 0.05$ ).

461 Nearly all genes that are significantly differentially expressed have monotonically  
462 increasing or decreasing patterns of expression between three levels of RpoS. Only

463 two genes (*ytfR* and *ytfT*) have an expression level at 26% RpoS that is significantly  
464 higher than the expression at both 100% and 0% RpoS. The only two genes with  
465 expression lower in the 26% RpoS condition than either 100% or 0% are *nlpD* and *pcm*.  
466 These genes lie immediately upstream of *rpoS*. *nlpD* was removed from the genome  
467 during the construction the arabinose inducible RpoS strain. The *pcm* gene is still  
468 present, but the level of transcription was lowered by the genetic modification.

469

#### 470 *Classifying quantitative responses to RpoS levels*

471 To explore how genes respond to changing levels of RpoS, we developed a new  
472 metric, *sensitivity*. Our null expectation was that gene expression would increase  
473 linearly with increasing RpoS concentration. We observed many genes in our RNA-seq  
474 data set (such as *osmY*) whose expression at intermediate RpoS levels falls on, or  
475 close, to a line drawn between the 0% and 100% RpoS conditions (Fig 4a). We refer to  
476 these genes as *linear* in their response to increasing RpoS levels. Other genes (such as  
477 *astA*) are transcribed more at 26% than would be expected based on their expression  
478 levels at 0% and 100% (Fig 4b). We refer to these genes as *sensitive*, because only a  
479 small amount of RpoS results in relatively high levels of transcription. In contrast, some  
480 genes (like *gadC*) are expressed at intermediate RpoS levels less than expected based  
481 on expression at 0% and 100% RpoS; such genes are referred to as *insensitive* (Fig 4c).

482 We identified 910 linear, 102 sensitive, and 32 insensitive genes. 96% of sensitive  
483 genes and 88% of insensitive genes are positively regulated by RpoS. In contrast, only  
484 53% of linear genes are positively regulated by RpoS, a significant difference (chi-  
485 square test,  $p < 0.001$ ).

486 To determine whether sensitive or insensitive genes are associated with specific  
487 physiological responses to increasing RpoS levels, we again used GO enrichment. We  
488 tested the null hypothesis that the functions of these genes are a random sample from  
489 the entire RpoS regulon (not the whole genome). The GO terms significantly enriched in  
490 the sensitive class are response to osmotic stress, cellular amino acid catabolic process,  
491 and fatty acid oxidation (Table 2). Several genes encoding regulators are among the  
492 sensitive genes, including *arcA*, which encodes a global regulator of respiratory  
493 metabolism, and *rssB*, which encodes the adaptor protein required for degradation of  
494 RpoS by ClpXP.

495 GO enrichment is less useful for understanding the possible function of the  
496 insensitive gene set. Three GO terms are enriched (Table 3), but only a few genes with  
497 these annotations are present in the insensitive gene set, and their enrichment probably  
498 reflects the relatively small number of insensitive genes. More strikingly, the insensitive  
499 genes include nearly all of the genes required for acid resistance system 2: the  
500 structural genes *gadA*, *gadB*, and, *gadC*, and the regulator of this system *gadE* (63, 64).  
501 In addition, the genes *yhiM*, *yhiD*, *hdeA*, *hdeB*, *hdeD*, *mdtE*, *mdtF*, all of which have  
502 been described as having roles in acid resistance (63, 64), are insensitive.

503 We used reverse transcription coupled to qPCR to confirm the expression patterns  
504 of two insensitive genes (*gadC* and *gadE*), and three sensitive genes (*prpR*, *prpD*, and  
505 *astA*). All genes were positively regulated by RpoS (Fig 5), and the median expression  
506 at 26% RpoS is consistent with RNA-seq expression patterns for all genes. We used a  
507 bootstrapping approach to assess if expression at 26% was significantly above or below  
508 the linear expectation at 26% RpoS. The expression of *gadC* was significantly

509 insensitive ( $p < 10^{-4}$ ), and *prpR* expression was significantly sensitive ( $p < 10^{-4}$ ). *astA*  
510 expression was marginally significantly sensitive ( $p = 0.06$  for sensitivity), while *gadE*  
511 and *prpD* were not significantly different from the linear expectation ( $p = 0.10$  and  $p =$   
512  $0.56$  respectively).

513

#### 514 *Control of sensitivity of expression*

515 What makes one promoter sensitive to RpoS levels and another promoter  
516 insensitive to RpoS levels? We hypothesized three possible mechanisms. First,  
517 chromosomal location could determine the response to RpoS levels, as is known to  
518 occur in the context of total transcription levels (65). Second, it is possible that the DNA  
519 sequence of the core promoter drives the response. Finally, it is possible that the  
520 binding of transcription factors upstream of the core promoter influences the response  
521 to RpoS levels. To test these hypotheses, we cloned the promoters (including all  
522 upstream transcription factor binding sites annotated in EcoCyc (66)) of four operons  
523 into the *lacZ* fusion plasmid pLFX (33). The four promoters were the sensitive  
524 *astCADBE*, and the insensitive *gadA*, *gadBC*, and *hdeAB-yhiD*. Plasmid pLFX  
525 recombines into the lambda-attachment site, placing the fusion in a novel genomic  
526 context. While we did not detect binding of RpoS upstream of *astC*, *gadA*, *gadB*, or  
527 *hdeA* by ChIP-seq, this is likely due to the difference in growth conditions, since these  
528 genes have been previously shown to be directly transcribed by RpoS (31, 67, 68).

529 The pattern of transcription of all four fusions was the same as observed for the  
530 respective genes in the RNA-seq data (Fig 6 a-d). *astC* transcription was sensitive to  
531 RpoS levels (one sample t-test,  $p = 0.04$ ), while *gadA*, *gadB*, and *hdeA* transcription



532 were all insensitive (one sample t-test,  $p = 2 \times 10^{-6}$ ,  $p = 10^{-5}$ ,  $p = 0.04$  respectively).

533 Since all reporters were placed at the same genomic locus, this result suggests that  
534 genomic location is not the determinant of response to RpoS levels.

535 A second potential mechanism to explain the difference between sensitive and  
536 insensitive genes is interactions between RpoS and the core promoter sequence. For  
537 example, specific nucleotides (or combinations of nucleotides) might tend to confer  
538 sensitive or insensitive patterns of transcription. The majority of both sensitive and  
539 insensitive genes were not associated with RpoS-bound regions in the ChIP-seq  
540 experiment, suggesting that they are indirectly regulated by RpoS (Table 4). The fact  
541 that most sensitive and insensitive genes are not bound by RpoS argues against the  
542 hypothesis of direct RpoS-DNA interactions driving sensitivity. To see if specific  
543 sequence motifs were consistently associated with sensitivity, we used the  
544 discriminative motif search feature of DREME (69) to search for motifs that differed  
545 between sensitive and linear, or insensitive and linear regulatory sequences. There are  
546 28 ChIP-seq peaks associated with an operon with at least one sensitive gene, and 4  
547 ChIP-seq peaks associated with an operon with at least one insensitive gene. We found  
548 no motifs that distinguished these sets of sequences, although the small number of  
549 sequences would have restricted the power of such a test.

550 To directly test the hypothesis that the core promoter region of RpoS-transcribed  
551 genes is responsible for determining the sensitivity to RpoS levels, we cloned this short  
552 region from the *astC*, *gadA*, *gadB*, *hdeA* promoters into pLFX and recombined the  
553 plasmids into the chromosome. These core promoters had absolute levels of  
554 transcription much lower than the entire promoter that included upstream transcription

555 factor binding sites (Fig 6e - h). The core promoter sequence for *astC* alone was  
556 somewhat less sensitive to RpoS levels than the full-length construct (two sample t-test,  
557  $p = 0.08$ ), although not significantly so, probably due to the variability of expression from  
558 the full-length *astC* reporter. The *gadA* and *gadB* core promoters differed significantly  
559 from their full-length promoters (two sample t-test,  $p = 0.01$  and  $p < 10^{-6}$ , respectively).  
560 The *hdeA* core promoter (Fig 6h) is not RpoS-dependent, showing a decline in  
561 expression of approximately 10% in the presence of RpoS. This is consistent with the  
562 previous finding that the ability of RpoD (but not RpoS) to transcribe *hdeA* is repressed  
563 by H-NS protein bound upstream of the promoter (70). The core promoter construct  
564 lacks the native H-NS binding sites upstream, and so the selectivity is apparently lost.  
565 Thus, the core promoters do not replicate the RpoS sensitivity of their whole promoter  
566 sequences. In addition, the three RpoS-dependent core promoters (Fig 6 e - g) do not  
567 differ from each other in sensitivity (ANOVA,  $p = 0.32$ ). We conclude that the core  
568 promoter is not responsible for RpoS sensitivity.

569 The *lacZ* fusions suggest that neither genomic location nor core promoter sequence  
570 influence the sensitivity of a promoter. The remaining possible mechanism is the binding  
571 of specific TFs. If this is the case, we might expect that sensitive and insensitive genes  
572 are enriched for binding by different TFs. We looked for such enrichment and found that  
573 the sensitive genes are enriched for binding by ArgR, Nac, and NtrC (FDR < 0.05). The  
574 insensitive genes are enriched for binding by ArcA, FliZ, GadE, GadW, GadX, H-NS,  
575 PhoP, RcsB, and TorR. This very large set of regulators occurs largely because these  
576 proteins are all annotated as regulating some or all of the operons involved in AR2:  
577 *gadA*, *gadBC*, *gadE*, *hdeAB-yhiD*, and *hdeD*. The action of GadE, GadW, and GadX

578 occurs primarily at these loci, while the other regulators have many additional known  
579 binding sites that are not near the promoters of insensitive genes. This specific  
580 enrichment for TFs highlights proteins that may be responsible for the sensitive or  
581 insensitive patterns of expression.

582

583 *Sensitivity to RpoS determines the timing of induction during entry into stationary*  
584 *phase*

585 We hypothesized that the degree of sensitivity to RpoS could impact the timing of  
586 expression under conditions when levels of active RpoS increase, such as during entry  
587 into stationary phase. A previous study used RNA-seq to monitor the transcriptome over  
588 a time-course of growth, including four time-points in stationary phase (48). We  
589 analyzed these data to determine whether insensitive, linear, and sensitive genes show  
590 differences in the timing of induction. We selected only those RpoS-induced genes  
591 whose transcription increased upon entry into stationary phase. (In total, there were 250  
592 such linear genes, 90 sensitive, and 19 insensitive.) We then determined the pattern of  
593 expression for each such gene over four time-points beginning at the onset of stationary  
594 phase. Although there is considerable variability in the expression patterns of genes, as  
595 a group the three classes show clear differences in the timing of induction (Figure 7a).  
596 Specifically, sensitive genes are induced most rapidly, followed closely by linear genes.  
597 In both cases, expression peaked early in stationary phase and fell between 30 and 180  
598 minutes after entering stationary phase. In contrast, insensitive genes showed relatively  
599 little change in expression until the final time-point, 180 minutes into stationary phase.  
600 To determine the importance of RpoS on the patterns of gene expression, we repeated

601 the above analysis using data generated from a  $\Delta rpoS$  strain. As expected, the large  
602 difference in timing between the groups of genes was greatly diminished (Figure 7b).  
603 We conclude that the sensitivity of a gene is associated with the timing of expression  
604 during stationary phase in an RpoS-dependent manner.

605

## 606 **Discussion**

607

### 608 *Expanding the known set of RpoS-transcribed genes and promoters*

609 The *E. coli* RpoS regulon has been widely investigated using targeted and genome-  
610 scale approaches. Most genome-scale studies have focused on genes whose  
611 expression is altered in the absence of RpoS (18–20, 55, 56). Hence, these studies  
612 cannot distinguish between genes that are transcribed by RpoS, and those that are  
613 indirectly regulated. ChIP-seq affords a high resolution view of RpoS binding. By  
614 combining ChIP-seq with RNA-seq, we have identified 123 RpoS-transcribed genes  
615 with high confidence, considerably expanding the known RpoS regulon. Previous  
616 studies have suggested a role for RpoS in direct repression of some target genes (47,  
617 57, 71). While we observed negative regulation of 439 genes by RpoS, there were  
618 fewer of these repressed genes associated with ChIP-seq peaks than expected by  
619 chance, suggesting that direct negative regulation by RpoS is rare.

620 Only two previous studies have used ChIP methods to map RpoS binding genome-  
621 wide in *E. coli*. The first used ChIP-chip to identify 868 RpoS-bound regions (47), many  
622 more identified in our study but with considerably lower resolution (median peak length  
623 of 324 bp for RpoS ChIP-chip). The second used ChIP-seq, but identified relatively few

624 RpoS-bound regions (54). Of the 63 RpoS-bound regions identified in that study, 41 are  
625 shared with those from our study.

626 The high resolution of ChIP-seq allowed us to identify specific promoter sequences  
627 recognized by RpoS. By combining ChIP-seq data with a TSS map, we identified many  
628 high-confidence RpoS promoters. These promoters are strongly enriched for the  
629 presence of a -10 hexamer, with sequence preferences consistent with several of the  
630 previously described features of RpoS promoters (53). Specifically, we observed a  
631 preference for a C at position -8 (within the -10 hexamer), a C at position -13  
632 (immediately upstream of the -10 hexamer), and a TAA at positions -6 to -4 (immediately  
633 downstream of the -10 hexamer). Previous studies have suggested that RpoS  
634 promoters often contain a -35 hexamer (72), although the spacing relative to the -10  
635 hexamer is considerably more variable than for  $\sigma^{70}$  promoters. However, we did not  
636 detect enrichment of a -35 hexamer-like sequence among RpoS promoters, suggesting  
637 that the requirement for this element is weak.

638

639 *Sensitivity to RpoS affects timing of expression, and groups functionally related*  
640 *genes*

641 As is true for many transcription factors, RpoS levels vary continuously across a  
642 wide range of conditions. Our data show that genes differ in the sensitivity of their  
643 response to RpoS levels. Moreover, whether a gene is sensitive or insensitive to RpoS  
644 levels is associated with its function, suggesting a physiological rationale for sensitivity.  
645 For example, insensitive genes include many of those involved in the glutamate-  
646 dependent acid resistance 2 system (AR2). These genes are of particular interest

647 because AR2 allows *E. coli* to survive a pH of 2, an important trait for its ability to pass  
648 through the stomach and colonize the gastrointestinal tract (73, 74). To some extent,  
649 the shared sensitivity of functionally related genes can be explained by operon structure,  
650 i.e. co-transcription of multiple functionally related genes from a single promoter.  
651 However, the phenomenon of shared sensitivity for functionally related genes extends  
652 beyond operons. For example, the insensitive genes involved in AR2 are transcribed  
653 from at least five different promoters (66).

654 The fact that functionally related genes often have similar patterns of sensitivity to  
655 RpoS suggests that sensitivity can serve as a mechanism to control the timing of gene  
656 expression, and hence to coordinate specific cellular processes as part of a response to  
657 environmental stresses. Consistent with this idea, we have shown that the sensitivity of  
658 genes to RpoS levels correlates with the timing of their expression. RpoS sensitivity  
659 may drive similar patterns of expression in response to other stresses. Different  
660 environmental stresses are known to upregulate RpoS to varying levels (8), suggesting  
661 that some insensitive genes may only be expressed under certain stresses. In addition  
662 to the effects on gene expression, sensitivity to RpoS may also impact the effects of  
663 mutations in *rpoS*, which have been seen to evolve in the lab (75, 76). We expect  
664 mutations attenuating RpoS to have the strongest effect on insensitive genes, and the  
665 weakest effect on sensitive genes.

666

#### 667 *Possible mechanisms of RpoS sensitivity*

668 While the connection between RpoS sensitivity and the timing of gene expression is  
669 clear, the molecular basis of sensitivity is less so. Our data indicate that the genomic

670 location of these operons does not determine the expression pattern. Moreover, several  
671 lines of evidence suggest that direct interactions between RpoS and the core promoter  
672 are also not responsible for determining sensitivity. First, analysis of the ChIP-seq data  
673 for the sensitive and insensitive genes finds no motif that distinguishes between them.  
674 Second, core promoters from both sensitive and insensitive genes do not replicate the  
675 pattern of expression of the full-length promoters. Third, the core promoters of a  
676 sensitive operon (*astC*) and two insensitive operons (*gadA* and *gadB*) have  
677 indistinguishable patterns of sensitivity, suggesting that what was excluded from those  
678 constructs (i.e., binding sites of regulatory proteins) determines the shape of the  
679 relationship.

680       Given our finding that core promoter sequences cannot explain the difference in  
681 sensitivity between promoters, we suggest that sensitivity is largely due to the action of  
682 specific regulatory proteins bound upstream. If this hypothesis is correct, it could also  
683 explain the physiological coherence of these groups. For example, many insensitive  
684 genes are involved in the AR2 phenotype and are also regulated by GadX, GadW, and  
685 GadE (77–79). If one or more of these three regulators was directly responsible for the  
686 insensitive pattern of expression, then this could help to explain the physiological  
687 coherence of the insensitive group. The sensitive genes, being a larger group, have no  
688 obvious single regulator, although relatively little is known about regulators that function  
689 in stationary phase.

690       It is also possible that the physical properties of promoters play a role in this process,  
691 either alone or in concert with transcription factor binding. For example, the supercoiling  
692 state of promoters influences levels of transcription (80, 81) and has been implicated in

693 regulating RpoS-dependent transcription (82, 83). It is possible that differential response  
694 of promoters to supercoiling levels, either due to interactions directly with RpoS or by  
695 changes in the ability of transcription factors to bind (84), plays a role in determining the  
696 sensitivity of a promoter. If this type of regulation plays a role, it must be due the  
697 structure of the whole promoter itself, rather than supercoiling differences conferred by  
698 genomic location (85). We know this because the full promoters cloned into *lacZ* fusions  
699 are able to replicate both sensitive and insensitive patterns of transcription, even when  
700 moved to the same chromosomal location..

701 RpoS responds to a wide variety of environmental cues, and regulates genes  
702 responsible for many different kinds of responses. This work has demonstrated that one  
703 facet of that response, the level of RpoS produced, has varying effects across the  
704 entirety of the regulon. The level of RpoS produced in a stress response, together with  
705 the action of other transcription factors, may help to tune the RpoS-dependent stress  
706 response in ways appropriate for individual stresses.

707

## 708 **Acknowledgements**

709 We thank Rachael Kretsch for experimental help, and Robert Drewell, Xuelin Wu,  
710 Jae Hur, Keith Derbyshire and Todd Gray for helpful discussions. This work was  
711 supported by HHMI Undergraduate Science Education award #52007544 to Harvey  
712 Mudd College and by the NIH Director's New Innovator Award Program,  
713 1DP2OD007188 (JTW).

714

## 715 **Literature Cited**



- 716 1. **Novick A, Weiner M.** 1957. Enzyme induction as an all-or-none phenomenon.  
717 Proc Natl Acad Sci U S A **43**:553–66.
- 718 2. **Ptashne M.** 2004. A Genetic Switch, Third Edition: Phage Lambda Revisited 3rd  
719 edition. Cold Spring Harbor Laboratory Press, Cold Spring Harbor, N.Y.
- 720 3. **Brinsmade SR, Alexander EL, Livny J, Stettner AI, Segrè D, Rhee KY,**  
721 **Sonenshein AL.** 2014. Hierarchical expression of genes controlled by the *Bacillus*  
722 *subtilis* global regulatory protein CodY. Proc Natl Acad Sci **111**:8227–8232.
- 723 4. **Battesti A, Majdalani N, Gottesman S.** 2011. The RpoS-mediated general stress  
724 response in *Escherichia coli*. Annu Rev Microbiol **65**:189–213.
- 725 5. **Hengge R.** 2011. Stationary-phase gene regulation in *Escherichia coli*, p. . In A.  
726 Böck, R. Curtiss III, J. B. Kaper, P. D. Karp, F. C. Neidhardt, T. Nyström, J. M.  
727 Slauch, C. L. Squires, D. Ussery (eds.), EcoSal - *Escherichia coli* and *Salmonella*:  
728 cellular and molecular biology. Washington, DC, ASM Press.
- 729 6. **Schellhorn HE.** 2014. Elucidating the function of the RpoS regulon. Future  
730 Microbiol **9**:497–507.
- 731 7. **Lange R, Hengge-Aronis R.** 1994. The cellular concentration of the sigma S  
732 subunit of RNA polymerase in *Escherichia coli* is controlled at the levels of  
733 transcription, translation, and protein stability. Genes Dev **8**:1600–1612.

- 734 8. **Mandel MJ, Silhavy TJ.** 2005. Starvation for different nutrients in *Escherichia coli*  
735 results in differential modulation of RpoS levels and stability. *J Bacteriol* **187**:434–  
736 442.
- 737 9. **Zafar MA, Carabetta VJ, Mandel MJ, Silhavy TJ.** 2014. Transcriptional occlusion  
738 caused by overlapping promoters. *Proc Natl Acad Sci* **111**:1557–1561.
- 739 10. **Hengge R.** 2009. Proteolysis of sigmaS (RpoS) and the general stress response in  
740 *Escherichia coli*. *Res Microbiol* **160**:667–76.
- 741 11. **Pratt LA, Silhavy TJ.** 1998. Crl stimulates RpoS activity during stationary phase.  
742 *Mol Microbiol* **29**:1225–1236.
- 743 12. **Hryckowian AJ, Battesti A, Lemke JJ, Meyer ZC, Welch RA.** 2014. IraL is an  
744 RssB anti-adaptor that stabilizes RpoS during logarithmic phase growth in  
745 *Escherichia coli* and *Shigella*. *mBio* **5**:e01043-14.
- 746 13. **Chiang SM, Dong T, Edge TA, Schellhorn HE.** 2011. Phenotypic diversity caused  
747 by differential RpoS activity among environmental *Escherichia coli* isolates. *Appl*  
748 *Environ Microbiol* **77**:7915–23.
- 749 14. **Bhagwat AA, Tan J, Sharma M, Kothary M, Low S, Tall BD, Bhagwat M.** 2006.  
750 Functional heterogeneity of RpoS in stress tolerance of enterohemorrhagic  
751 *Escherichia coli* strains. *Appl Environ Microbiol* **72**:4978–86.

- 752 15. **Ferenci T, Galbiati HF, Betteridge T, Phan K, Spira B.** 2011. The constancy of  
753 global regulation across a species: the concentrations of ppGpp and RpoS are  
754 strain-specific in *Escherichia coli*. *BMC Microbiol* **11**:62.
- 755 16. **Snyder E, Gordon DM, Stoebel DM.** 2012. *Escherichia coli* lacking RpoS are rare  
756 in natural populations of non-pathogens. *G3 GenesGenomesGenetics* **2**:1341–  
757 1344.
- 758 17. **Bleibtreu A, Clermont O, Darlu P, Glodt J, Branger C, Picard B, Denamur E.**  
759 2014. The *rpoS* gene is predominantly inactivated during laboratory storage and  
760 undergoes source-sink evolution in *Escherichia coli* species. *J Bacteriol* **196**:4276–  
761 4284.
- 762 18. **Patten CL, Kirchhof MG, Schertzberg MR, Morton R a, Schellhorn HE.** 2004.  
763 Microarray analysis of RpoS-mediated gene expression in *Escherichia coli* K-12.  
764 *Mol Genet Genomics* **272**:580–91.
- 765 19. **Weber H, Polen T, Heuveling J, Wendisch VF, Hengge R.** 2005. Genome-wide  
766 analysis of the general stress response network in *Escherichia coli*: sigmaS-  
767 dependent genes, promoters, and sigma factor selectivity. *J Bacteriol* **187**:1591–  
768 603.
- 769 20. **Dong T, Schellhorn HE.** 2009. Control of RpoS in global gene expression of  
770 *Escherichia coli* in minimal media. *Mol Genet Genomics* **281**:19–33.
- 771 21. **Khlebnikov A, Datsenko KA, Skaug T, Wanner BL, Keasling JD.** 2001.  
772 Homogeneous expression of the P<sub>BAD</sub> promoter in *Escherichia coli* by constitutive

- 773 expression of the low-affinity high-capacity AraE transporter. *Microbiology*  
774 **147**:3241–3247.
- 775 22. **Baba T, Ara T, Hasegawa M, Takai Y, Okumura Y, Baba M, Datsenko KA,**  
776 **Tomita M, Wanner BL, Mori H.** 2006. Construction of *Escherichia coli* K-12 in-  
777 frame, single-gene knockout mutants: the Keio collection. *Mol Syst Biol*  
778 **2**:2006.0008.
- 779 23. **Haldimann A, Wanner BL.** 2001. Conditional-replication, integration, excision, and  
780 retrieval plasmid-host systems for gene structure-function studies of bacteria. *J*  
781 *Bacteriol* **183**:6384–93.
- 782 24. **Datsenko KA, Wanner BL.** 2000. One-step inactivation of chromosomal genes in  
783 *Escherichia coli* K-12 using PCR products. *Proc Natl Acad Sci U S A* **97**:6640–  
784 6645.
- 785 25. **Stoebel DM, Hokamp K, Last MS, Dorman CJ.** 2009. Compensatory evolution of  
786 gene regulation in response to stress by *Escherichia coli* lacking RpoS. *PLoS*  
787 *Genet* **5**:e1000671.
- 788 26. **Groth D, Reszka R, Schenk JA.** 1996. Polyethylene glycol-mediated  
789 transformation of *Escherichia coli* is increased by room temperature incubation.  
790 *Anal Biochem* **240**:302–304.
- 791 27. **Butland G, Peregrín-Alvarez JM, Li J, Yang W, Yang X, Canadien V, Starostine**  
792 **A, Richards D, Beattie B, Krogan N, Davey M, Parkinson J, Greenblatt J, Emili**

- 793        **A.** 2005. Interaction network containing conserved and essential protein complexes  
794        in *Escherichia coli*. *Nature* **433**:531–537.
- 795    28. **Fraley CD, Kim JH, McCann MP, Matin A.** 1998. The *Escherichia coli* starvation  
796        gene *cstC* is involved in amino acid catabolism. *J Bacteriol* **180**:4287–4290.
- 797    29. **Castanie-Cornet M-P, Foster JW.** 2001. *Escherichia coli* acid resistance: cAMP  
798        receptor protein and a 20 bp *cis*-acting sequence control pH and stationary phase  
799        expression of the *gadA* and *gadBC* glutamate decarboxylase genes. *Microbiology*  
800        **147**:709–715.
- 801    30. **Gibson DG, Young L, Chuang R-Y, Venter JC, Hutchison CA, Smith HO.** 2009.  
802        Enzymatic assembly of DNA molecules up to several hundred kilobases. *Nat*  
803        *Methods* **6**:343–345.
- 804    31. **Arnqvist A, Olsén A, Normark S.** 1994. Sigma S-dependent growth-phase  
805        induction of the *csgBA* promoter in *Escherichia coli* can be achieved in vivo by  
806        sigma 70 in the absence of the nucleoid-associated protein H-NS. *Mol Microbiol*  
807        **13**:1021–1032.
- 808    32. **De Biase D, Tramonti A, Bossa F, Visca P.** 1999. The response to stationary-  
809        phase stress conditions in *Escherichia coli*: role and regulation of the glutamic acid  
810        decarboxylase system. *Mol Microbiol* **32**:1198–211.
- 811    33. **Edwards AN, Patterson-Fortin LM, Vakulskas CA, Mercante JW, Potrykus K,**  
812        **Vinella D, Camacho MI, Fields JA, Thompson SA, Georgellis D, Cashel M,**

- 813        **Babitzke P, Romeo T.** 2011. Circuitry linking the Csr and stringent response  
814        global regulatory systems. *Mol Microbiol* **80**:1561–1580.
- 815    34. **Farewell A, Kvint K, Nyström T.** 1998. Negative regulation by RpoS: a case of  
816        sigma factor competition. *Mol Microbiol* **29**:1039–51.
- 817    35. **Li H, Durbin R.** 2009. Fast and accurate short read alignment with Burrows–  
818        Wheeler transform. *Bioinformatics* **25**:1754–1760.
- 819    36. **Anders S, Pyl PT, Huber W.** 2015. HTSeq--a Python framework to work with high-  
820        throughput sequencing data. *Bioinformatics* **31**:166–169.
- 821    37. **Anders S, Huber W.** 2010. Differential expression analysis for sequence count  
822        data. *Genome Biol* **11**:R106.
- 823    38. **Benjamini Y, Hochberg Y.** 1995. Controlling the false discovery rate: a practical  
824        and powerful approach to multiple testing. *J R Stat Soc Ser B Methodol* **57**:289–  
825        300.
- 826    39. **Alexa A, Rahnenfuhrer J.** 2010. topGO: Enrichment analysis for Gene Ontology.  
827        R package version 2.22.0.
- 828    40. **Carlson M.** org.EcK12.eg.db: Genome wide annotation for *E. coli* strain K12. R  
829        package version 3.0.0.
- 830    41. **Micallef L, Rodgers P.** 2014. eulerAPE: drawing area-proportional 3-venn  
831        diagrams using ellipses. *PLoS ONE* **9**:e101717.

- 832 42. **Salgado H, Peralta-Gil M, Gama-Castro S, Santos-Zavaleta A, Muñiz-Rascado**  
833 **L, García-Sotelo JS, Weiss V, Solano-Lira H, Martínez-Flores I, Medina-Rivera**  
834 **A, Salgado-Osorio G, Alquicira-Hernández S, Alquicira-Hernández K, López-**  
835 **Fuentes A, Porrón-Sotelo L, Huerta AM, Bonavides-Martínez C, Balderas-**  
836 **Martínez YI, Pannier L, Olvera M, Labastida A, Jiménez-Jacinto V, Vega-**  
837 **Alvarado L, Del Moral-Chávez V, Hernández-Alvarez A, Morett E, Collado-**  
838 **Vides J.** 2013. RegulonDB v8.0: omics data sets, evolutionary conservation,  
839 regulatory phrases, cross-validated gold standards and more. *Nucleic Acids Res*  
840 **41:D203-213.**
- 841 43. **Singh SS, Singh N, Bonocora RP, Fitzgerald DM, Wade JT, Grainger DC.** 2014.  
842 Widespread suppression of intragenic transcription initiation by H-NS. *Genes Dev*  
843 **28:214–219.**
- 844 44. **Fitzgerald DM, Bonocora RP, Wade JT.** 2014. Comprehensive mapping of the  
845 *Escherichia coli* flagellar regulatory network. *PLoS Genet* **10:e1004649.**
- 846 45. **Machanick P, Bailey TL.** 2011. MEME-ChIP: motif analysis of large DNA datasets.  
847 *Bioinformatics* **27:1696–1697.**
- 848 46. **Bailey TL, Elkan C.** 1994. Fitting a mixture model by expectation maximization to  
849 discover motifs in biopolymers. *Proc Int Conf Intell Syst Mol Biol* **2:28–36.**
- 850 47. **Cho B-K, Kim D, Knight EM, Zengler K, Palsson BO.** 2014. Genome-scale  
851 reconstruction of the sigma factor network in *Escherichia coli*: topology and  
852 functional states. *BMC Biol* **12:4.**

- 853 48. **Conway T, Creecy JP, Maddox SM, Grissom JE, Conkle TL, Shadid TM,**  
854 **Teramoto J, San Miguel P, Shimada T, Ishihama A, Mori H, Wanner BL.** 2014.  
855 Unprecedented high-resolution view of bacterial operon architecture revealed by  
856 RNA sequencing. *mBio* **5**:e01442-1414.
- 857 49. **Vandesompele J, Preter KD, Pattyn F, Poppe B, Roy NV, Paepe AD, Speleman**  
858 **F.** 2002. Accurate normalization of real-time quantitative RT-PCR data by  
859 geometric averaging of multiple internal control genes. *Genome Biol*  
860 **3**:research0034.
- 861 50. **Miller JH.** 1992. A short course in bacterial genetics. Cold Spring Harbor  
862 Laboratory Press.
- 863 51. **Holm S.** 1979. A simple sequentially rejective multiple test procedure. *Scand J Stat*  
864 **6**:65–70.
- 865 52. **Lévi-Meyrueis C, Monteil V, Sismeiro O, Dillies M-A, Monot M, Jagla B,**  
866 **Coppée J-Y, Dupuy B, Norel F.** 2014. Expanding the RpoS/ $\sigma$ S-Network by RNA  
867 Sequencing and Identification of  $\sigma$ S-Controlled Small RNAs in *Salmonella*. *PLoS*  
868 *One* **9**:e96918.
- 869 53. **Typas A, Becker G, Hengge R.** 2007. The molecular basis of selective promoter  
870 activation by the sigmaS subunit of RNA polymerase. *Mol Microbiol* **63**:1296–306.
- 871 54. **Peano C, Wolf J, Demol J, Rossi E, Petiti L, De Bellis G, Geiselmann J, Egli T,**  
872 **Lacour S, Landini P.** 2015. Characterization of the *Escherichia coli*  $\sigma$ S core



- 873 regulon by chromatin immunoprecipitation-sequencing (ChIP-seq) analysis. Sci  
874 Rep **5**:10469.
- 875 55. **Lacour S, Landini P.** 2004. SigmaS-dependent gene expression at the onset of  
876 stationary phase in *Escherichia coli*: function of sigmaS-dependent genes and  
877 identification of their promoter sequences. J Bacteriol **186**:7186–7195.
- 878 56. **Dong T, Kirchhof MG, Schellhorn HE.** 2008. RpoS regulation of gene expression  
879 during exponential growth of *Escherichia coli* K12. Mol Genet Genomics MGG  
880 **279**:267–277.
- 881 57. **Rosenthal AZ, Kim Y, Gralla JD.** 2008. Poising of *Escherichia coli* RNA  
882 polymerase and its release from the sigma38 C-terminal tail for *osmY* transcription.  
883 J Mol Biol **376**:938–949.
- 884 58. **Reppas NB, Wade JT, Church GM, Struhl K.** 2006. The transition between  
885 transcriptional initiation and elongation in *E. coli* is highly variable and often rate  
886 limiting. Mol Cell **24**:747–757.
- 887 59. **Schröder O, Wagner R.** 2000. The bacterial DNA-binding protein H-NS represses  
888 ribosomal RNA transcription by trapping RNA polymerase in the initiation complex1.  
889 J Mol Biol **298**:737–748.
- 890 60. **Rosenthal AZ, Hu M, Gralla JD.** 2006. Osmolyte-induced transcription: -35 region  
891 elements and recognition by sigma38 (rpoS). Mol Microbiol **59**:1052–61.

- 892 61. **Huo Y-X, Rosenthal AZ, Gralla JD.** 2008. General stress response signalling:  
893 unwrapping transcription complexes by DNA relaxation via the sigma38 C-terminal  
894 domain. *Mol Microbiol* **70**:369–378.
- 895 62. **Bonocora RP, Smith C, Lapierre P, Wade JT.** 2015. Genome-scale mapping of  
896 *Escherichia coli* sigma54 reveals widespread, conserved intragenic binding. *PLOS*  
897 *Genet* **11**:e1005552.
- 898 63. **Mates AK, Sayed AK, Foster JW.** 2007. Products of the *Escherichia coli* acid  
899 fitness island attenuate metabolite stress at extremely low pH and mediate a cell  
900 density-dependent acid resistance. *J Bacteriol* **189**:2759–2768.
- 901 64. **Kanjee U, Houry WA.** 2013. Mechanisms of acid resistance in *Escherichia coli*.  
902 *Annu Rev Microbiol* **67**:65–81.
- 903 65. **Bryant JA, Sellars LE, Busby SJW, Lee DJ.** 2014. Chromosome position effects  
904 on gene expression in *Escherichia coli* K-12. *Nucleic Acids Res* **42**:11383–11392.
- 905 66. **Keseler IM, Mackie A, Peralta-Gil M, Santos-Zavaleta A, Gama-Castro S,**  
906 **Bonavides-Martínez C, Fulcher C, Huerta AM, Kothari A, Krummenacker M,**  
907 **Latendresse M, Muñiz-Rascado L, Ong Q, Paley S, Schröder I, Shearer AG,**  
908 **Subhraveti P, Travers M, Weerasinghe D, Weiss V, Collado-Vides J, Gunsalus**  
909 **RP, Paulsen I, Karp PD.** 2013. EcoCyc: fusing model organism databases with  
910 systems biology. *Nucleic Acids Res* **41**:D605–D612.

- 911 67. **Kiupakis AK, Reitzer L.** 2002. ArgR-independent induction and ArgR-dependent  
912 superinduction of the *astCADBE* operon in *Escherichia coli*. *J Bacteriol* **184**:2940–  
913 2950.
- 914 68. **Waterman SR, Small PLC.** 2003. Transcriptional expression of *Escherichia coli*  
915 glutamate-dependent acid resistance genes *gadA* and *gadBC* in an *hns rpoS*  
916 mutant. *J Bacteriol* **185**:4644–4647.
- 917 69. **Bailey TL.** 2011. DREME: motif discovery in transcription factor ChIP-seq data.  
918 *Bioinformatics* **27**:1653–1659.
- 919 70. **Shin M, Song M, Rhee JH, Hong Y, Kim Y-J, Seok Y-J, Ha K-S, Jung S-H,**  
920 **Choy HE.** 2005. DNA looping-mediated repression by histone-like protein H-NS:  
921 specific requirement of E $\sigma$ 70 as a cofactor for looping. *Genes Dev* **19**:2388–2398.
- 922 71. **Levi-Meyrueis C, Monteil V, Sismeiro O, Dillies M-A, Kolb A, Monot M, Dupuy**  
923 **B, Duarte SS, Jagla B, Coppee J-Y, Beraud M, Norel F.** 2015. Repressor activity  
924 of the RpoS/ S-dependent RNA polymerase requires DNA binding. *Nucleic Acids*  
925 *Res* **43**:1456–1468.
- 926 72. **Typas A, Hengge R.** 2006. Role of the spacer between the -35 and -10 regions in  
927 sigmaS promoter selectivity in *Escherichia coli*. *Mol Microbiol* **59**:1037–1051.
- 928 73. **Richard HT, Foster JW.** 2003. Acid resistance in *Escherichia coli*. *Adv Appl*  
929 *Microbiol* **52**:167–186.

- 930 74. **Lund P, Tramonti A, Biase DD.** 2014. Coping with low pH: molecular strategies in  
931 neutralophilic bacteria. *FEMS Microbiol Rev* **38**:1091–1125.
- 932 75. **Zambrano MM, Siegele DA, Almirón M, Tormo A, Kolter R.** 1993. Microbial  
933 competition: *Escherichia coli* mutants that take over stationary phase cultures.  
934 *Science* **259**:1757–60.
- 935 76. **Spira B, de Almeida Toledo R, Maharjan RP, Ferenci T.** 2011. The uncertain  
936 consequences of transferring bacterial strains between laboratories - *rpoS*  
937 instability as an example. *BMC Microbiol* **11**:248.
- 938 77. **Hommais F, Krin E, Coppée J-Y, Lacroix C, Yeramian E, Danchin A, Bertin P.**  
939 2004. GadE (YhiE): a novel activator involved in the response to acid environment  
940 in *Escherichia coli*. *Microbiol Read Engl* **150**:61–72.
- 941 78. **Tramonti A, De Canio M, Delany I, Scarlato V, De Biase D.** 2006. Mechanisms  
942 of transcription activation exerted by GadX and GadW at the *gadA* and *gadBC*  
943 gene promoters of the glutamate-based acid resistance system in *Escherichia coli*.  
944 *J Bacteriol* **188**:8118–27.
- 945 79. **Seo SW, Kim D, O'Brien EJ, Szubin R, Palsson BO.** 2015. Decoding genome-  
946 wide GadEWX-transcriptional regulatory networks reveals multifaceted cellular  
947 responses to acid stress in *Escherichia coli*. *Nat Commun* **6**:7970.
- 948 80. **Travers A, Muskhelishvili G.** 2005. DNA supercoiling - a global transcriptional  
949 regulator for enterobacterial growth? *Nat Rev Microbiol* **3**:157–169.

- 950 81. **Dorman CJ**. 2006. DNA supercoiling and bacterial gene expression. *Sci Prog*  
951 **89**:151–166.
- 952 82. **Conter A, Menchon C, Gutierrez C**. 1997. Role of DNA supercoiling and RpoS  
953 sigma factor in the osmotic and growth phase-dependent induction of the Gene  
954 *osmE* of *Escherichia coli* K12. *J Mol Biol* **273**:75–83.
- 955 83. **Bordes P, Conter A, Morales V, Bouvier J, Kolb A, Gutierrez C**. 2003. DNA  
956 supercoiling contributes to disconnect  $\sigma$ S accumulation from  $\sigma$ S-dependent  
957 transcription in *Escherichia coli*. *Mol Microbiol* **48**:561–571.
- 958 84. **Cameron ADS, Dorman CJ**. 2012. A fundamental regulatory mechanism  
959 operating through OmpR and DNA topology controls expression of *Salmonella*  
960 pathogenicity islands SPI-1 and SPI-2. *PLoS Genet* **8**:e1002615.
- 961 85. **Dorman CJ**. 2013. Genome architecture and global gene regulation in bacteria:  
962 making progress towards a unified model? *Nat Rev Microbiol* **11**:349–355.
- 963 86. **Schneider TD, Stephens RM**. 1990. Sequence logos: a new way to display  
964 consensus sequences. *Nucleic Acids Res* **18**:6097–6100.
- 965 87. **Crooks GE, Hon G, Chandonia J-M, Brenner SE**. 2004. WebLogo: a sequence  
966 logo generator. *Genome Res* **14**:1188–1190.

967

968

969

970 **Table 1** Biological processes enriched in the RpoS regulon.

971

972

| GO ID      | GO Term                                     | Genes in genome | Observed in regulon | Expected in regulon | p-value |
|------------|---------------------------------------------|-----------------|---------------------|---------------------|---------|
| GO:0009063 | cellular amino acid catabolic process       | 69              | 38                  | 18.5                | 3.5e-07 |
| GO:0006099 | tricarboxylic acid cycle                    | 20              | 15                  | 5.35                | 8.3e-06 |
| GO:0006096 | glycolytic process                          | 18              | 14                  | 4.81                | 8.3e-06 |
| GO:0006094 | gluconeogenesis                             | 13              | 9                   | 3.48                | 0.0016  |
| GO:0009441 | glycolate metabolic process                 | 6               | 5                   | 1.6                 | 0.0063  |
| GO:0006090 | pyruvate metabolic process                  | 21              | 17                  | 5.61                | 0.0180  |
| GO:0006970 | response to osmotic stress                  | 28              | 13                  | 7.49                | 0.0190  |
| GO:0006542 | glutamine biosynthetic process              | 10              | 6                   | 2.67                | 0.0270  |
| GO:0009060 | aerobic respiration                         | 65              | 33                  | 17.38               | 0.0285  |
| GO:0006006 | glucose metabolic process                   | 36              | 20                  | 9.62                | 0.0317  |
| GO:0016052 | carbohydrate catabolic process              | 276             | 94                  | 73.79               | 0.0326  |
| GO:0009101 | glycoprotein biosynthetic process           | 13              | 7                   | 3.48                | 0.0342  |
| GO:0019395 | fatty acid oxidation                        | 30              | 13                  | 8.02                | 0.0354  |
| GO:0000162 | tryptophan biosynthetic process             | 11              | 6                   | 2.94                | 0.0463  |
| GO:0009246 | enterobacterial common antigen biosynthesis | 11              | 6                   | 2.94                | 0.0463  |
| GO:0042398 | cellular modified amino acid biosynthesis   | 17              | 7                   | 4.55                | 0.0472  |
| GO:0009239 | enterobactin biosynthetic process           | 6               | 4                   | 1.6                 | 0.0472  |
| GO:0000270 | peptidoglycan metabolic process             | 51              | 14                  | 13.64               | 0.0475  |

973 **Table 2** Biological processes enriched in the sensitive genes.

974

| GO ID      | GO Term                               | Genes in genome | Observed in sensitive set | Expected in sensitive set | p-value |
|------------|---------------------------------------|-----------------|---------------------------|---------------------------|---------|
| GO:0006970 | response to osmotic stress            | 13              | 4                         | 0.79                      | 0.0055  |
| GO:0009063 | cellular amino acid catabolic process | 38              | 6                         | 2.31                      | 0.0210  |
| GO:0019395 | fatty acid oxidation                  | 13              | 3                         | 0.79                      | 0.0385  |

979 **Table 3** Biological processes enriched in the insensitive genes.

980

| GO ID      | GO Term                                | Genes in genome | Observed in insensitive set | Expected in insensitive set | p-value |
|------------|----------------------------------------|-----------------|-----------------------------|-----------------------------|---------|
| GO:0006412 | translation                            | 21              | 3                           | 0.6                         | 0.018   |
| GO:0006164 | purine nucleotide biosynthetic process | 10              | 2                           | 0.28                        | 0.030   |
| GO:0006805 | xenobiotic metabolic process           | 13              | 2                           | 0.37                        | 0.044   |

987

988



989  
990  
991  
992  
993  
994

**Table 4** Contingency table of the sensitivity of a gene and if its promoter is or is not bound by RpoS.

|                   | Sensitive | Linear | Insensitive |
|-------------------|-----------|--------|-------------|
| Bound by RpoS     | 31        | 87     | 5           |
| Not bound by RpoS | 71        | 823    | 27          |

995  
996

997  
998

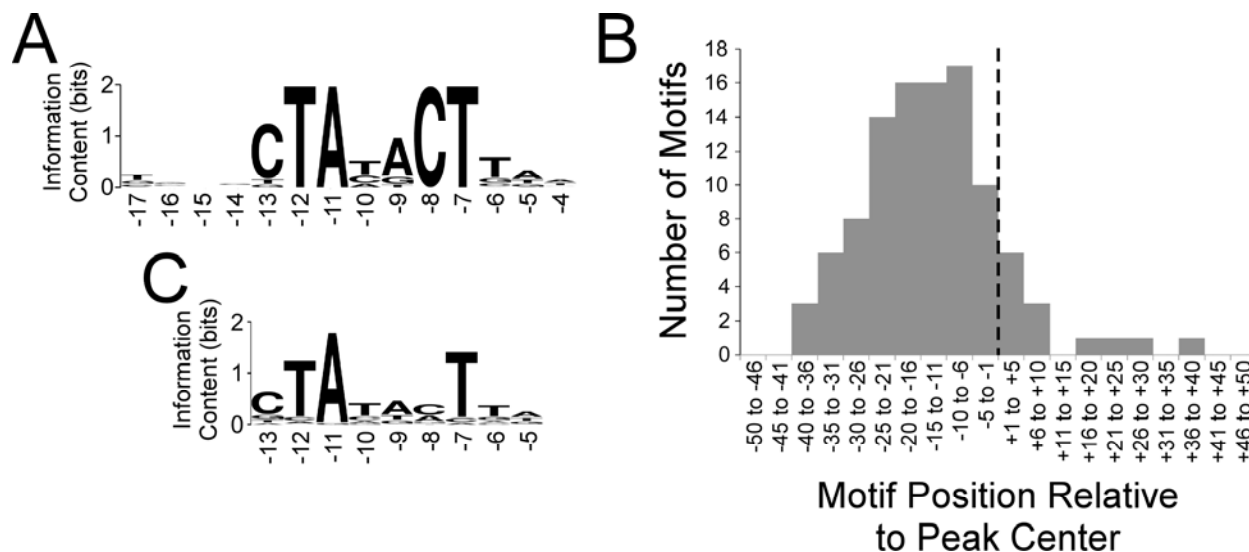

999  
1000  
1001  
1002  
1003  
1004  
1005  
1006  
1007  
1008  
1009  
1010  
1011  
1012  
1013  
1014

**Figure 1. Analysis of RpoS ChIP-seq data.** (A) Sequence logo (86) of the enriched sequence motif associated with RpoS-bound regions (MEME E-value  $2 \times 10^{-40}$ ). The sequence logo was generated using WebLogo (87). Numbers below the motif refer to positions relative to the transcription start, based on known sequence preferences for RpoS (53). (B) Histogram showing the frequency distribution of distances between identified motifs and ChIP-seq peak centers. The black, vertical, dashed line indicates the peak center position. (C) Sequence logo (86) of the enriched sequence motif associated with TSSs located within 20 bp of RpoS ChIP-seq peak centers (MEME E-value  $3 \times 10^{-56}$ ). Note that only a subset of the motif identified by MEME is shown, but positions outside the shown region all have information content below 0.2. The sequence logo was generated using WebLogo (87). Numbers below the motif refer to positions relative to the transcription start, based on known sequence preferences for RpoS (53).

1015  
1016

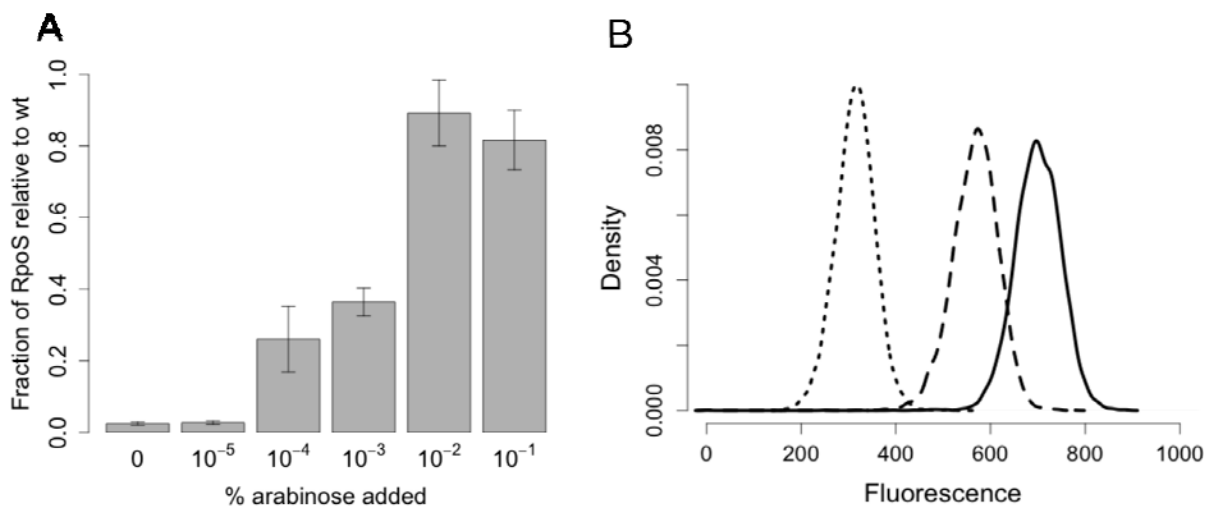

1017  
1018 **Figure 2. Arabinose control of RpoS protein levels in strain DMS2564.** (a)  
1019 Increasing arabinose results in more RpoS expression in strain DMS2564, as measured  
1020 by western blotting. n = 4 to 5; error bars represent SEM. (b) Flow cytometric  
1021 measurement of an *otsB-gfp* fusion under 0%, 10<sup>-4</sup>%, and 10<sup>-1</sup>% arabinose. (Dotted line,  
1022 dashed line, and solid line, respectively.)

1023  
1024  
1025  
1026  
1027  
1028

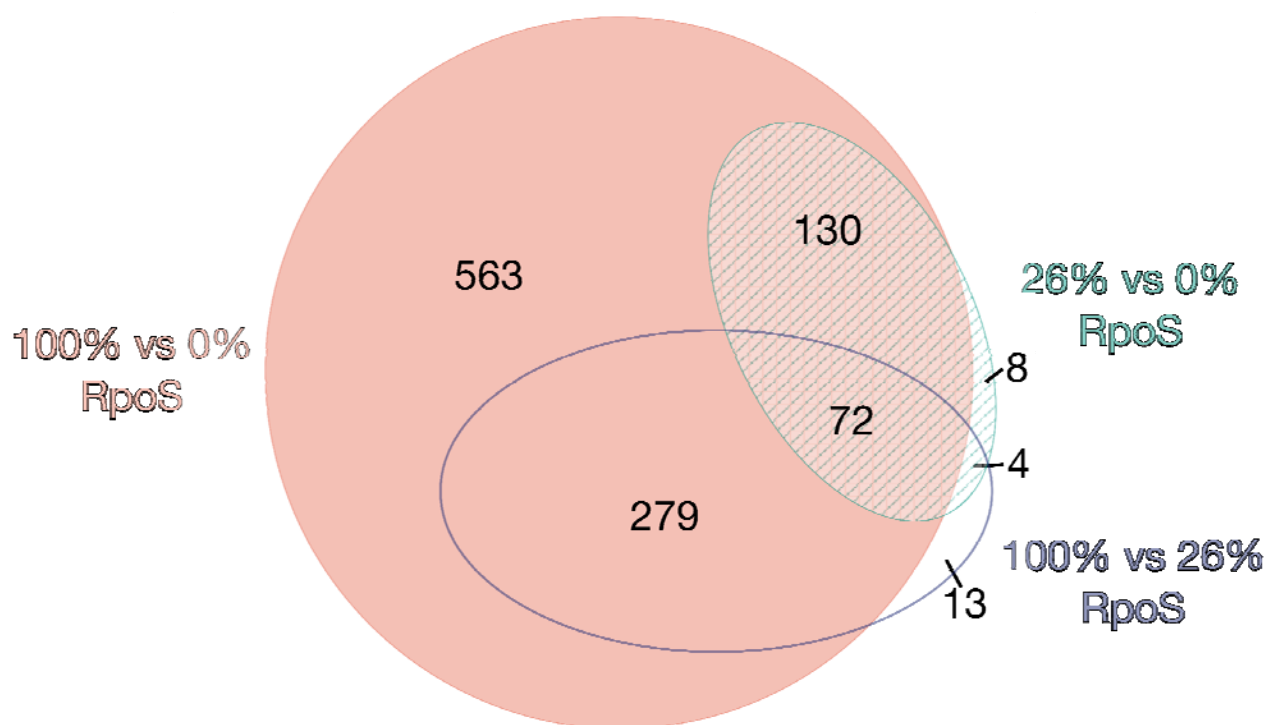

1029  
1030 **Figure 3:** Area proportional Venn diagram showing the number of genes  
1031 differentially expressed between each of the three conditions.  
1032  
1033  
1034  
1035  
1036  
1037  
1038  
1039  
1040  
1041

1042  
1043  
1044

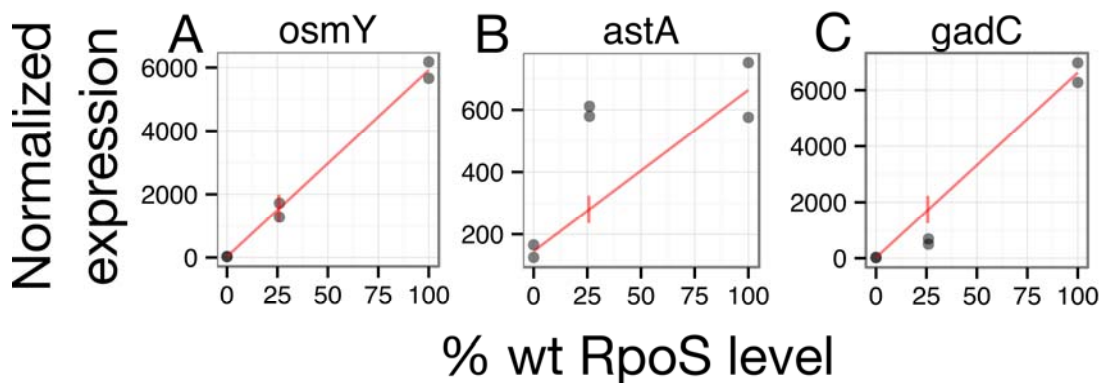

1045  
1046  
1047  
1048  
1049  
1050  
1051  
1052  
1053

**Figure 4:** Examples of three classes of patterns of RpoS response. *osmY* expression is linear with RpoS level, *astA* is sensitive to RpoS level, and *gadC* is insensitive to RpoS level. Dots represent normalized expression levels from individual RNA-seq samples. The line is drawn between the mean at 0% and the mean at 100%.

1054

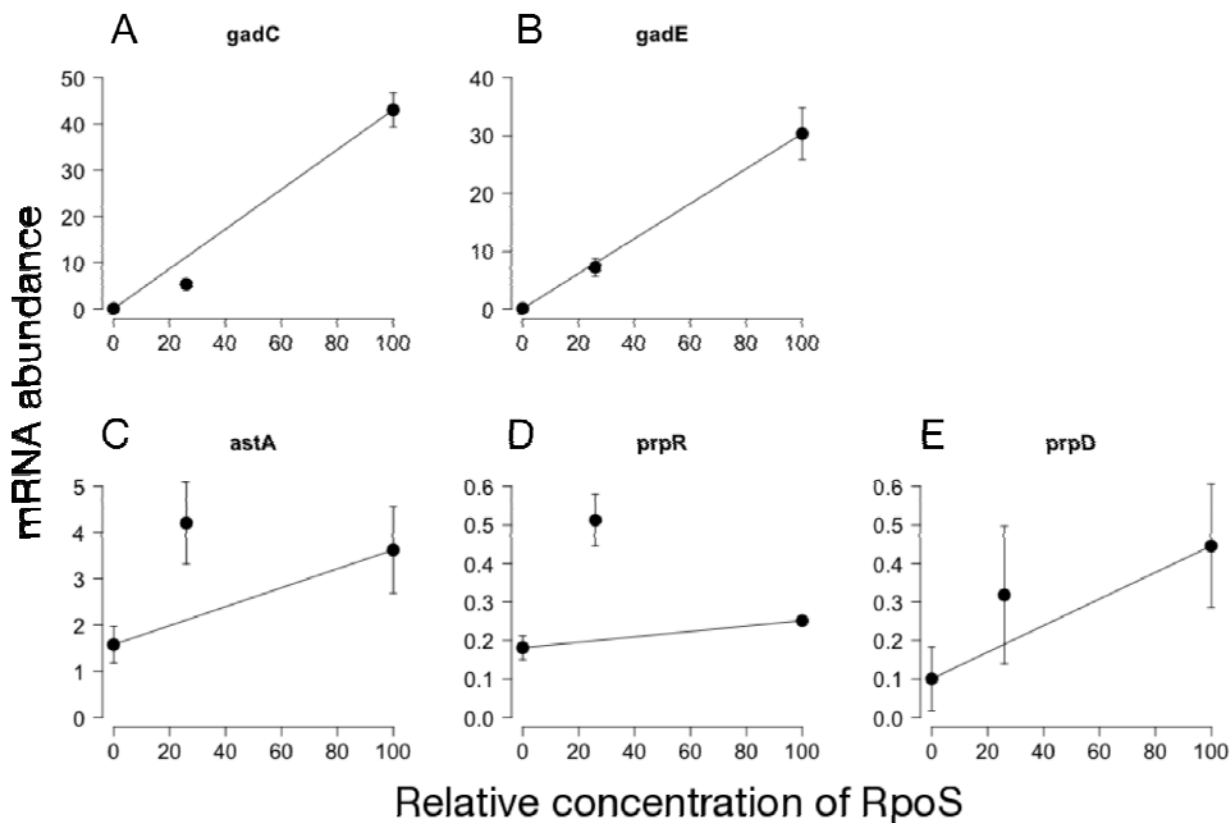

1055

1056

1057

1058 **Figure 5. Testing of RNA-seq expression patterns using qPCR.** Expression  
1059 patterns were measured for (a,b) *gadC* and *gadE*, which were insensitive in the RNA-  
1060 seq data, and (c-e) *astA*, *prpR*, and *prpD*, which were sensitive in the RNA-seq data. In  
1061 all cases, the level of transcription at 26% RpoS was on the side of the line predicted by  
1062 the RNA-seq data, though not always significantly so. *gadC* was significantly insensitive  
1063 ( $p < 10^{-4}$ ), *gadE* was not significantly different from linear ( $p = 0.10$ ), *astA* was not quite  
1064 significantly sensitive ( $p = 0.06$ ), *prpR* was significant sensitive ( $p < 10^{-4}$ ), and *prpD* was  
1065 not significant ( $p = 0.56$ ).  $n = 6$ , error bars = SEM.

1065

1066

1067

1068

1069

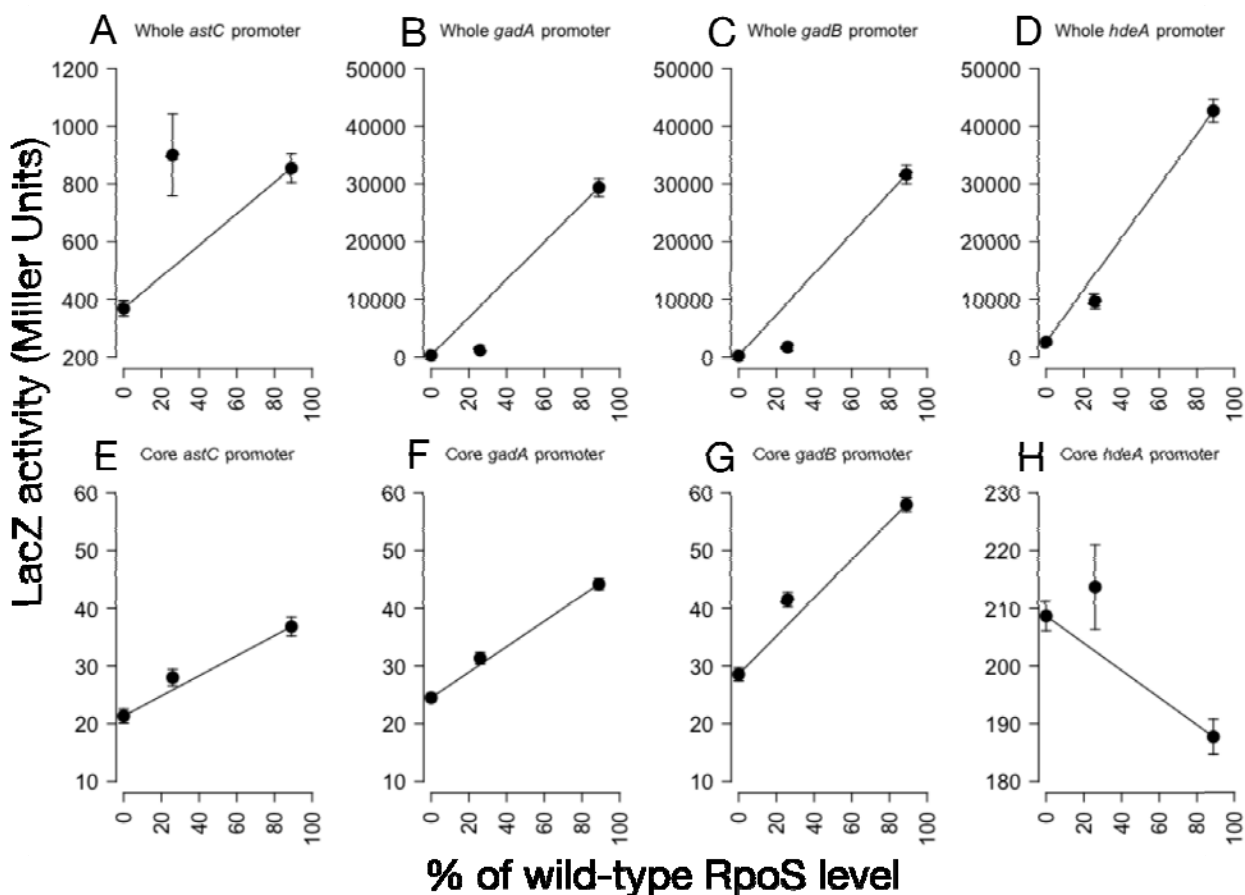

1070

1071

1072

**Figure 6. Expression patterns of whole promoters and core promoters only.**

1073

Expression patterns were measured for the (a - d) whole upstream regulatory region

1074

and the (e - h) core promoter only of *astC*, *gadA*, *gadB*, and *hdeA*. As expected by

1075

RNA-seq data, the whole *astC* fusion was sensitive ( $p = 0.04$ , t-test), and the *gadA*,

1076

*gadB*, and *hdeA* fusions were all insensitive ( $p = 2 \times 10^{-6}$ ,  $p = 10^{-5}$ ,  $p = 0.04$ , all by one

1077

sample t-test). The p-values are adjusted for multiple comparisons using Holm's

1078

sequential adjustment method (51). The core promoters (e - h) have much lower levels

1079

of maximal transcription than the full length promoters. All four have much altered

1080

patterns of sensitivity, although only *gadA* and *gadB* was significantly different from the

1081

whole promoter ( $p = 0.08$  (*astC*),  $p = 0.01$  (*gadA*),  $p = 10^{-6}$  (*gadB*),  $p = 0.21$  (*hdeA*), all

1082

by two-sample t-test with Holm's correction.)  $n = 6$  to  $8$ , error bars = SEM.

1083

1084

1085  
1086

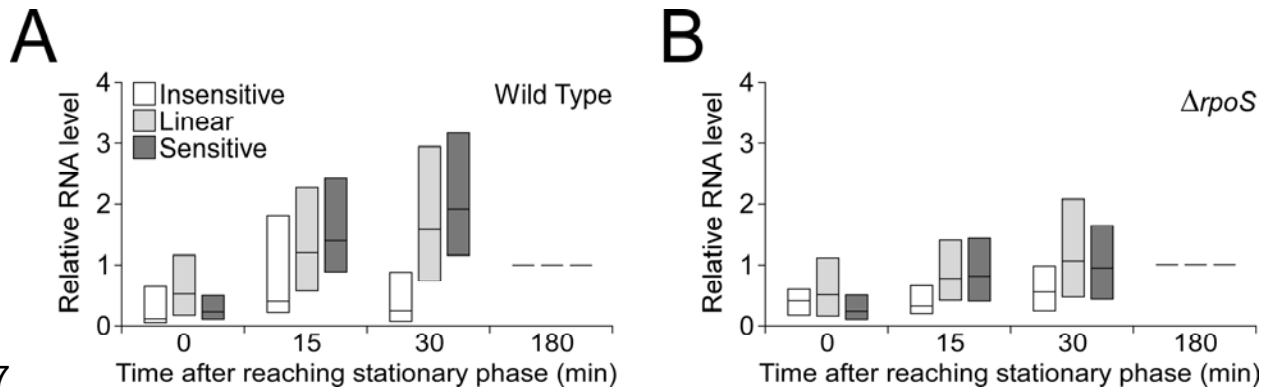

1087  
1088  
1089

1090 **Figure 7. Expression profiles of genes when cells enter stationary phase.**

1091 **(A)** Relative expression levels of RpoS-regulated genes were taken from a  
1092 published study (48) for four time-points following entry into stationary phase. All  
1093 expression values were normalized to those from the final time-point for each  
1094 gene. The graph shows the range of relative expression values for insensitive  
1095 (white boxes), linear (light gray boxes), and sensitive (dark gray boxes) genes for  
1096 each time-point. Boxes represent the 25<sup>th</sup>-75<sup>th</sup> percentile range, and horizontal  
1097 lines indicate the median value. **(B)** As above, but for a  $\Delta rpoS$  strain of *E. coli*.
